# Supplementary material
Source: Springer Nature journal article supplement (https://www.springermedizin.de/resource/supplementary/12936_2013_2881_MOESM7_ESM.pdf/9544502)
Supplement: MOESM7 [file 9544502]

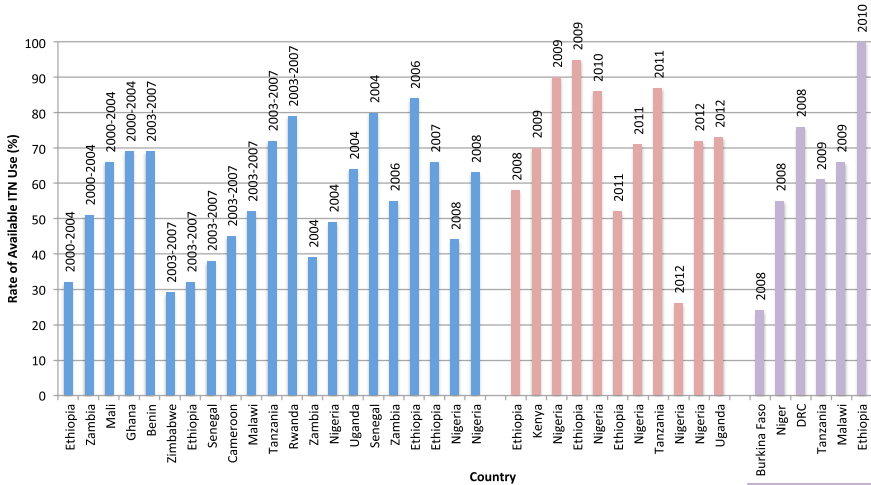

NATIONAL HOUSEHOLD SURVEY DATA

DATA FROM OBSERVATIONAL STUDIES

BASELINE DATA FROM INTERVENTION STUDIES
